# Supplementary material for: The gut microbiota as a potential biomarker for methamphetamine use disorder: evidence from two independent datasets
Source: PubMed Central journal article supplement (PMC10543748; doi:10.3389/fcimb.2023.1257073), 2023-09-18

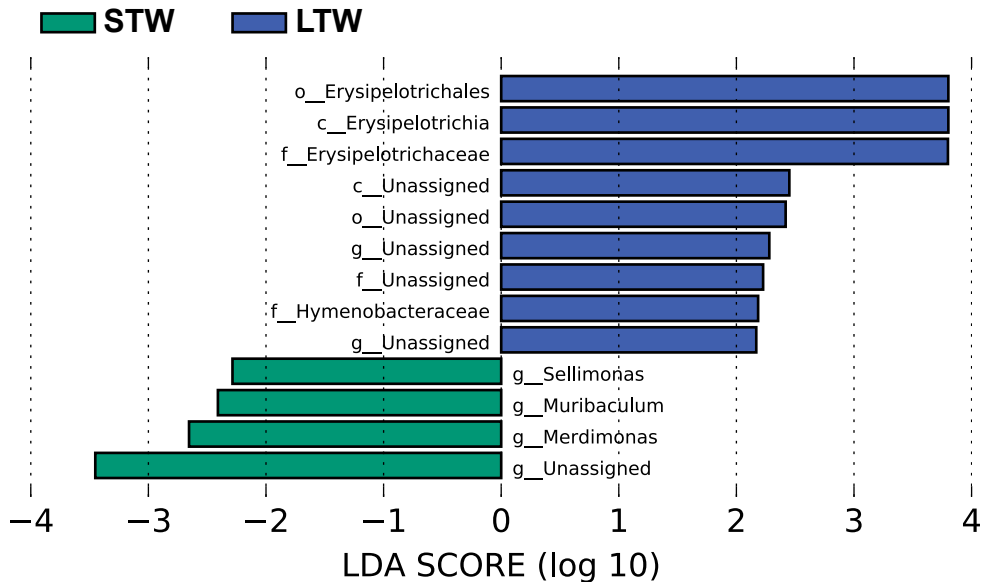

Supplement: DataSheet_2.pdf [file DataSheet_2.pdf]
